# Supplementary material
Source: PubMed Central journal article supplement (PMC3631459)
Supplement: NIHMS445582-supplement-1_si_001.pdf [file NIHMS445582-supplement-1_si_001.pdf]

# Potent and Selective Inhibition of A-to-I RNA Editing with 2'-O-Methyl/Locked Nucleic Acid-containing Antisense Oligoribonucleotides

Rena A. Mizrahi, Nicole T. Schirle and Peter A. Beal\*  
[beal@chem.ucdavis.edu](mailto:beal@chem.ucdavis.edu)

## Supporting Information

|                                                                                                          | Pages |
|----------------------------------------------------------------------------------------------------------|-------|
| • Supplementary Table 1: Oligonucleotide Sequences Used for Antisense and RT-PCR.....                    | 2     |
| • Supplementary Figure 1: Representative TLC of <sup>32</sup> P-labeled NEIL1 RNA deamination assay..... | 3     |
| • Supplementary Figure 2: Representative sequencing traces from HeLa cells.....                          | 4     |

**Supplementary Table 1: Oligonucleotide Sequences Used for Antisense and RT-PCR**

| <b>Oligonucleotides</b>                     | <b>Sequence (5' to 3')</b> |
|---------------------------------------------|----------------------------|
| <b>Antisense oligonucleotides</b>           |                            |
| OMe1                                        | CAUAAUCCGAAAGUAUUGAGCAU    |
| 5HT <sub>2c</sub> R morpholino              | CAUAAUCCGAAAGUAUUGAGCAU    |
| OMe2                                        | ACAGUACAUAUCCGAAAGUAUU     |
| 5HT <sub>2c</sub> R LNA/2'-O-methyl mixmer* | ACAGUACATAAUCCGAAAGUAUU    |
| NL18 mixmer*                                | CTGUGGGACAGAGGAACA         |
| NL18 control mixmer*                        | <b>GGAAUCAAGTAUAGCUCA</b>  |
| NL18 morpholino                             | CTGUGGGACAGAGGAACA         |
|                                             |                            |
| <b>RT-PCR</b>                               |                            |
| DNA for primer extension                    | CCGCGAATTGAAACGGCTATGCTC   |
| NEIL1 Outside Forward                       | TCCAGACCTGCTGGAGCTAT       |
| NEIL1 Outside Reverse                       | TGGCCTTGGATTTCTTTTTG       |
| NEIL1 Inside Forward                        | CCCAAGGAAGTGGTCCAGTTGG     |
| NEIL1 Inside Reverse                        | CTGGAACCAGATGGTACGGCC      |
| BLCAP Outside Forward                       | CCAGAGAGCACAGCGGC          |
| BLCAP Outside Reverse                       | CAAATTGTGCAAGGCTTCCG       |
| BLCAP Inside Forward                        | TCAGCTCCTGGAGAGTGAGGGTT    |
| BLCAP Inside Reverse                        | TCCAGGAGGAAGCTGAGCAGGTAG   |

\*bold and italicized residues are LNA

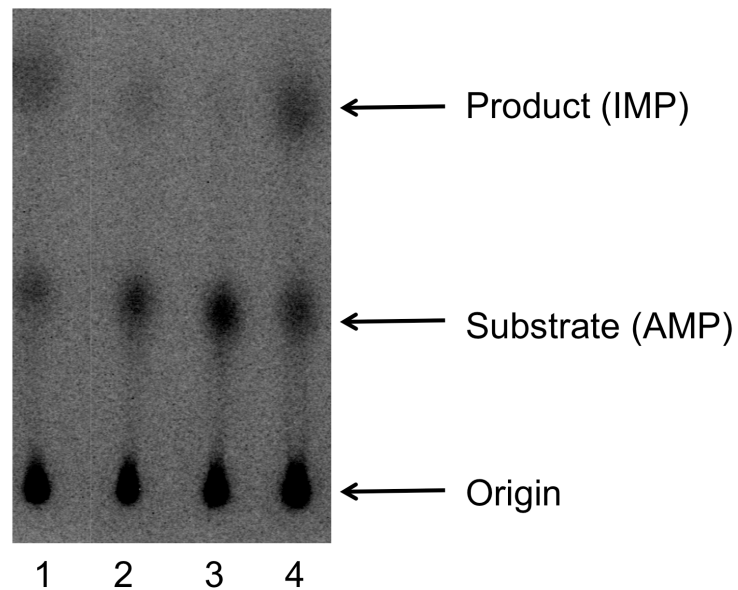

**Figure S1.** Inhibition of editing of the NEIL1 RNA by the NL18 mixmer. Representative storage phosphor diagram of TLC plate used to separate deamination products arising from the reaction of 50 nM ADAR1 with  $\leq 18$  nM RNA. Lanes 1-3: AON concentrations of 0, 10, 30 nM, respectively. Lane 4: 100 nM of the control AON.

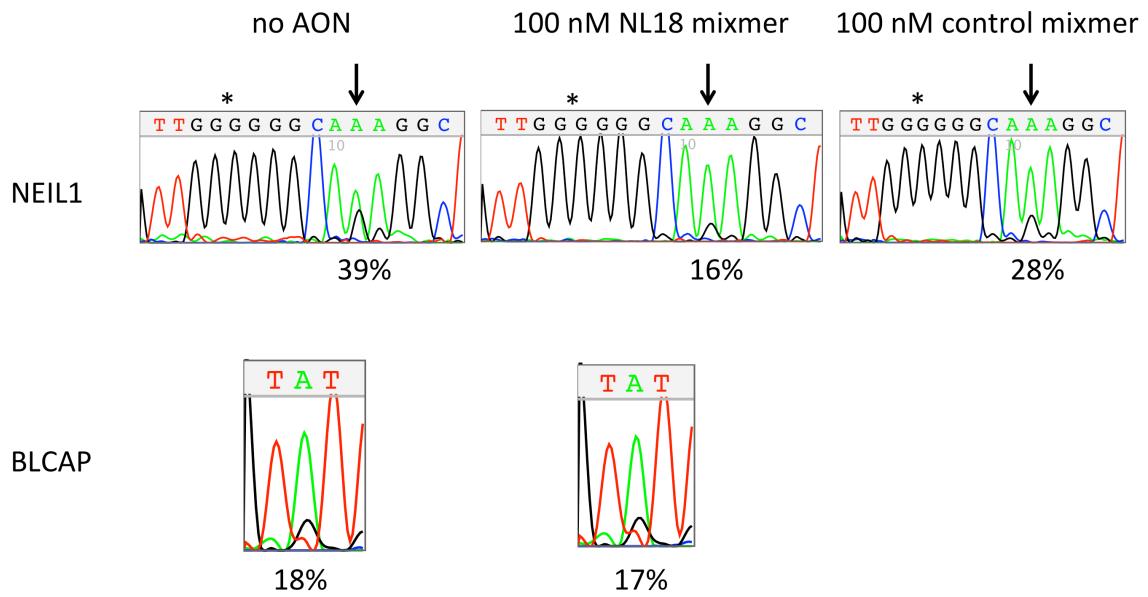

**Figure S2.** Representative sequencing traces upon isolation of RNA from HeLa cells with treatment of varying concentrations of AON. AON target for inhibition is the NEIL1 pre-mRNA, the BLCAP RNA is used as a control. Arrow indicates recoding site, \* indicates exon-exon junction.
